# Supplementary material for: Self-assembly induced ferromagnetic interaction in magnetic polymers with terphenyl linkers
Source: Royal Society of Chemistry journal article supplement (doi:10.1039/d3py00186e), 2023-01-01
Supplement: d3py00186e1.pdf [file d3py00186e1.pdf]

## Supporting Information

for

### **Self-assembly induced ferromagnetic interaction in magnetic polymer with terphenyl linkers**

Shengqi Ji<sup>a</sup>, Xiaoyan Yuan<sup>a</sup>, Qianjin Guo<sup>b</sup>, Lixia Ren<sup>a\*</sup>

<sup>a</sup> School of Materials Science and Engineering, Tianjin Key Laboratory of Composite and Functional Materials, Tianjin University, Tianjin, 300350, China

<sup>b</sup> Analysis and Measurement Center, Tianjin University, Tianjin 300072, China

\* Email: [lxren@tju.edu.cn](mailto:lxren@tju.edu.cn)

## Table of Contents

|            |     |                 |                                                                      |     |
|------------|-----|-----------------|----------------------------------------------------------------------|-----|
| Figure S3  | S1  | $^1\text{H}$    | NMR spectra of Nor-N-bromobutyl in $\text{CDCl}_3$                   |     |
| Figure S4  | S2  | $^{13}\text{C}$ | NMR spectra of Nor-N-bromobutyl in $\text{CDCl}_3$                   |     |
| Figure S5  | S3  | $^1\text{H}$    | NMR spectra of 4,4''-diol-terphenyl in $\text{DMSO-}d_6$             |     |
| Figure S6  | S4  | $^{13}\text{C}$ | NMR spectra of 4,4''-diol-terphenyl in $\text{DMSO-}d_6$             |     |
| Figure S7  | S5  |                 | Mass spectrum of 4,4''-diol-terphenyl                                |     |
| Figure S8  | S6  | $^1\text{H}$    | NMR spectra of Nor-terph in $\text{DMSO-}d_6$                        |     |
| Figure S7  |     | $^{13}\text{C}$ | NMR spectra of Nor-terph in $\text{DMSO-}d_6$                        | S9  |
| Figure S8  | S8  | $^1\text{H}$    | NMR spectra of Nor-terph-bromobutyl in $\text{CDCl}_3$               |     |
| Figure S9  |     | $^{13}\text{C}$ | NMR spectra of Nor-terph-bromobutyl in $\text{CDCl}_3$               | S11 |
| Figure S10 | S10 | $^{13}\text{C}$ | NMR spectra of TMTBDI[Cl] in $\text{DMSO-}d_6$                       |     |
| Figure S11 | S11 |                 | Mass spectrum of TMTBDI[Cl]                                          |     |
| Figure S12 | S12 | $^1\text{H}$    | NMR spectra of polymerization reaction solution in $\text{DMSO-}d_6$ |     |
| Figure S13 | S13 | XRD             | pattern of PTMTBDI[ $\text{FeCl}_4$ ] before self-assembly           |     |
| Figure S14 | S14 | HR-TEM          | image of self-assembled PTMTBDI[ $\text{FeCl}_4$ ]                   |     |
| Figure S15 | S15 | Energy          | spectra of self-assembled PTMTBDI[ $\text{FeCl}_4$ ]                 |     |

S17

Figure S16 Raman spectra of self-assembled PTMTBDI[FeCl<sub>4</sub>]  
S18

Figure S17 Magnetic field dependence of the magnetization at 50 K for self-  
assembled PTMTBDI[FeCl<sub>4</sub>]  
S19

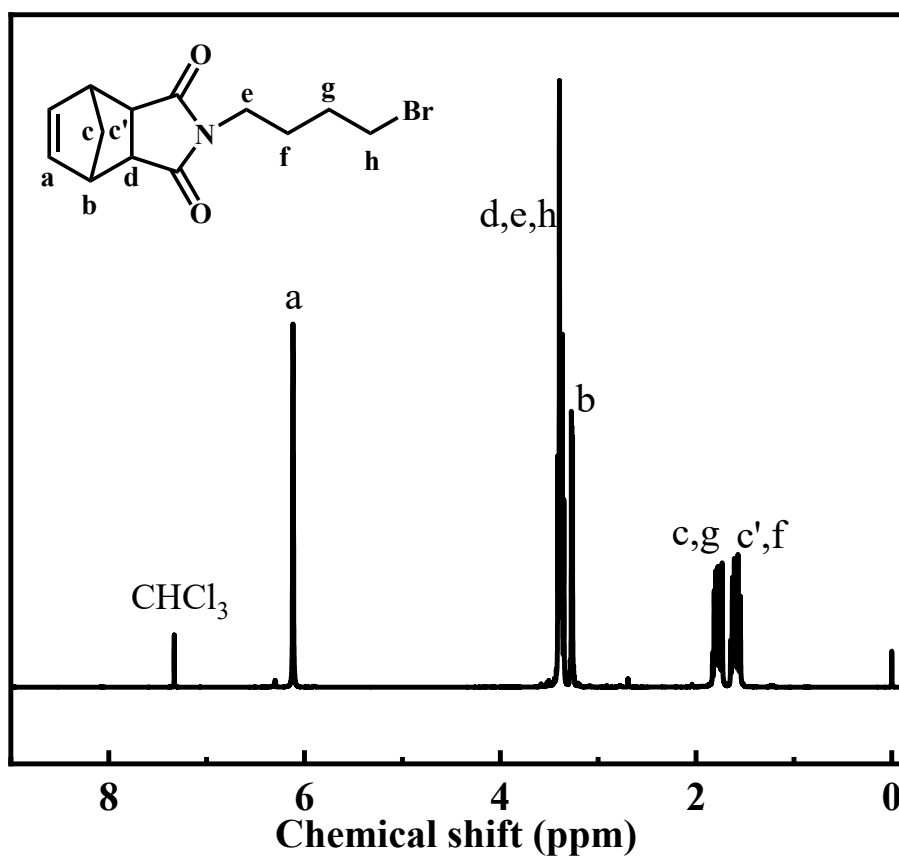

Figure S1. <sup>1</sup>H NMR spectra of Nor-N-bromobutyl in CDCl<sub>3</sub>.

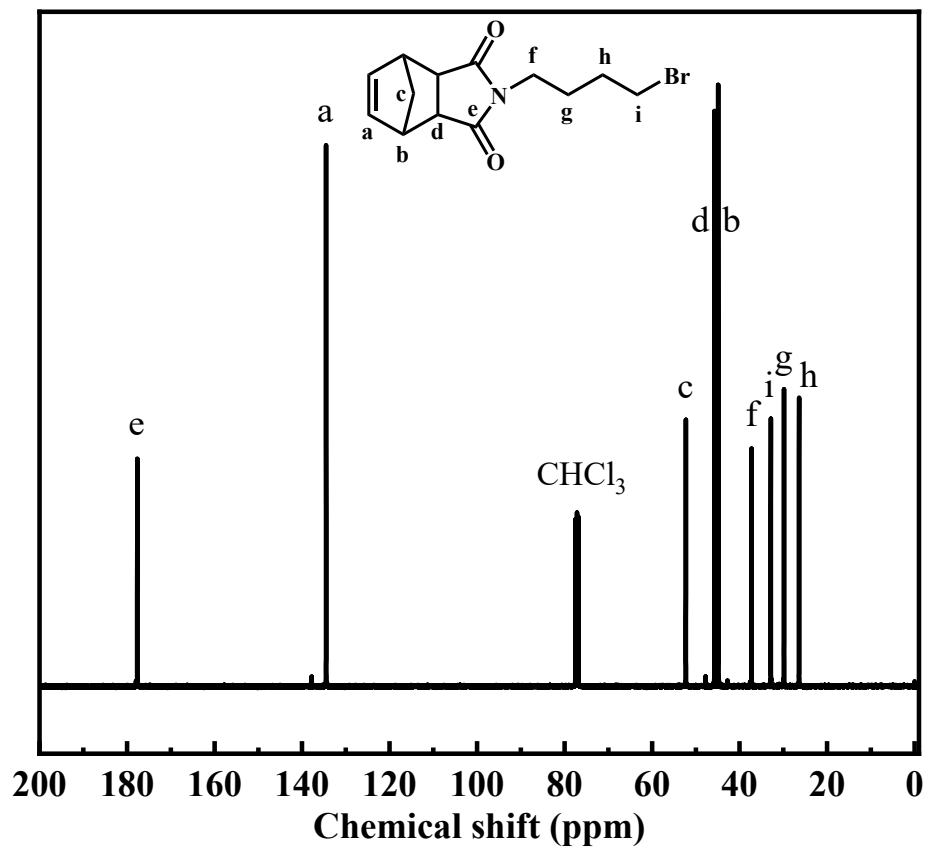

Figure S2.  $^{13}\text{C}$  NMR spectra of Nor-*N*-bromobutyl in  $\text{CDCl}_3$ .

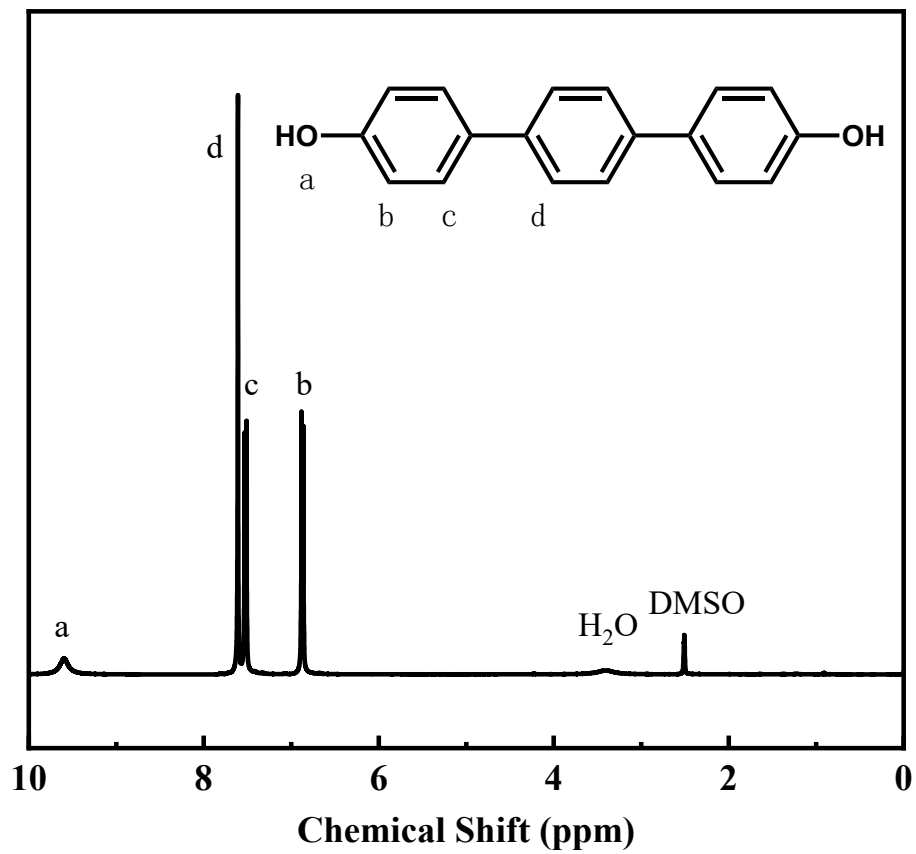

Figure S3. <sup>1</sup>H NMR spectra of 4,4''-diol-terphenyl in DMSO-*d*<sub>6</sub>.

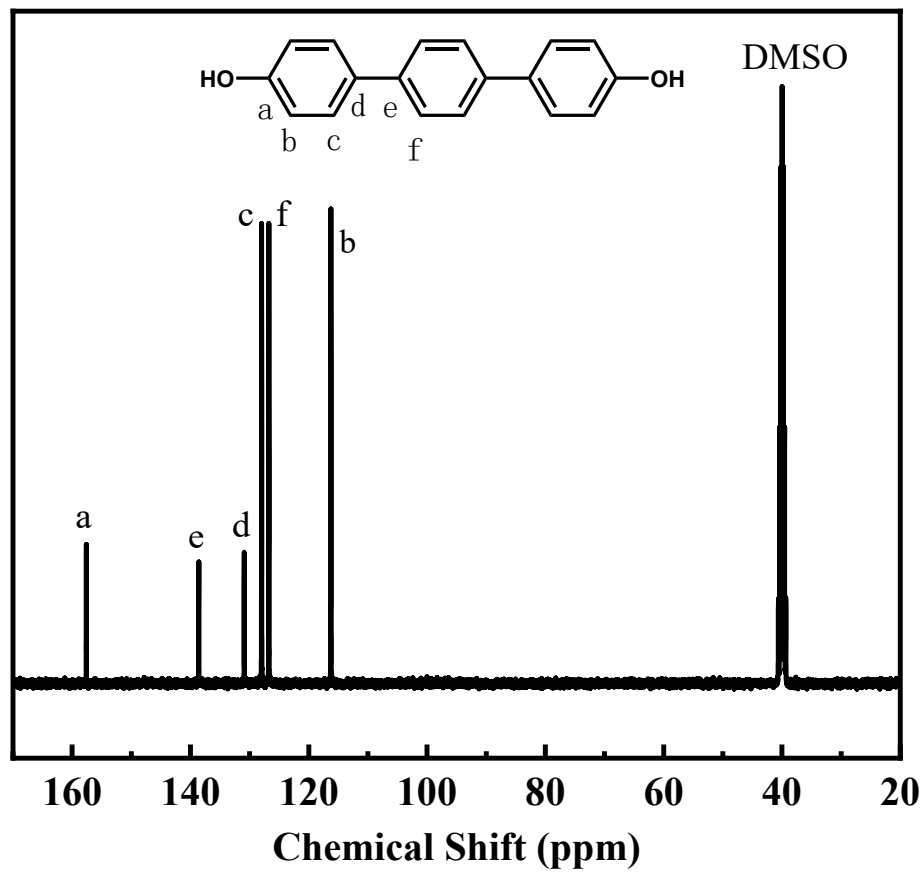

Figure S4.  $^{13}\text{C}$  NMR spectra of 4,4''-diol-terphenyl in  $\text{DMSO-}d_6$ .

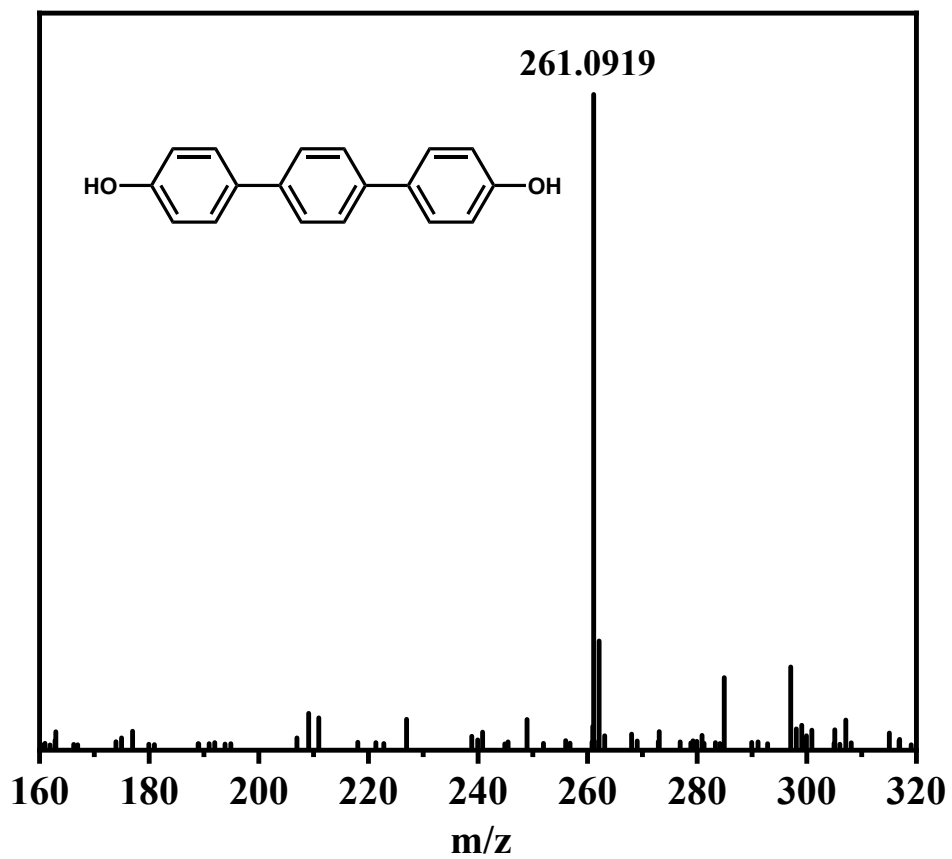

Figure S5. Mass spectrum of 4,4''-diol-terphenyl.

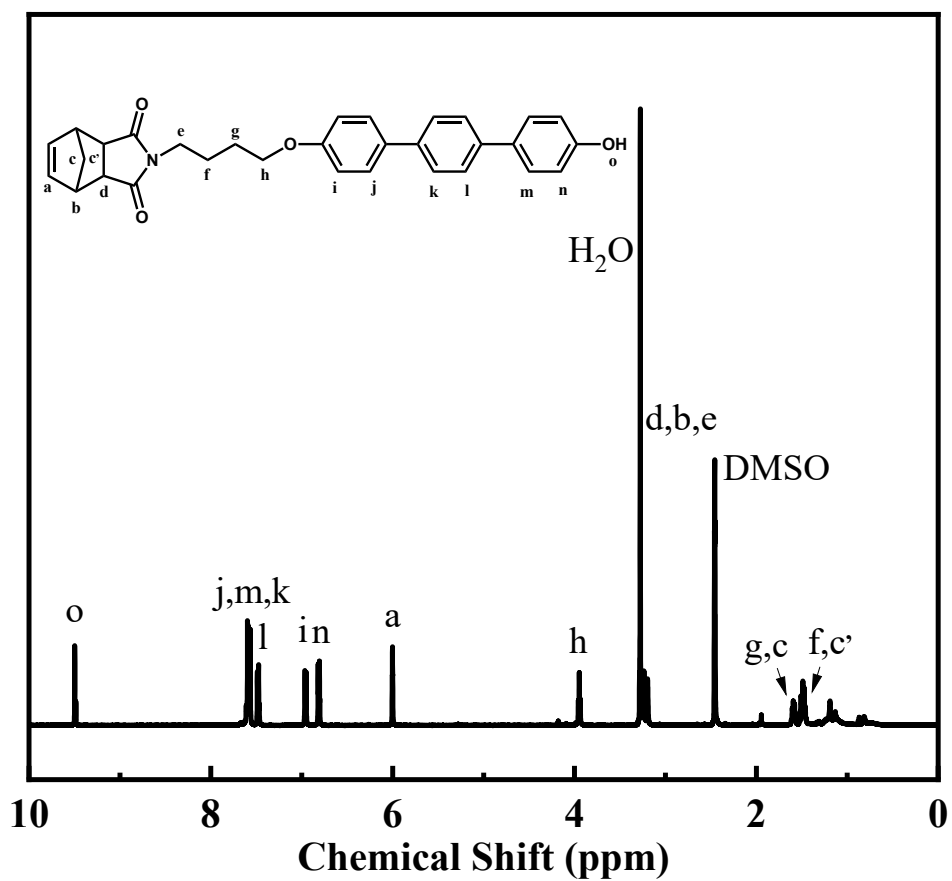

Figure S6.  $^1\text{H}$  NMR spectra of Nor-terph in  $\text{DMSO-}d_6$ .



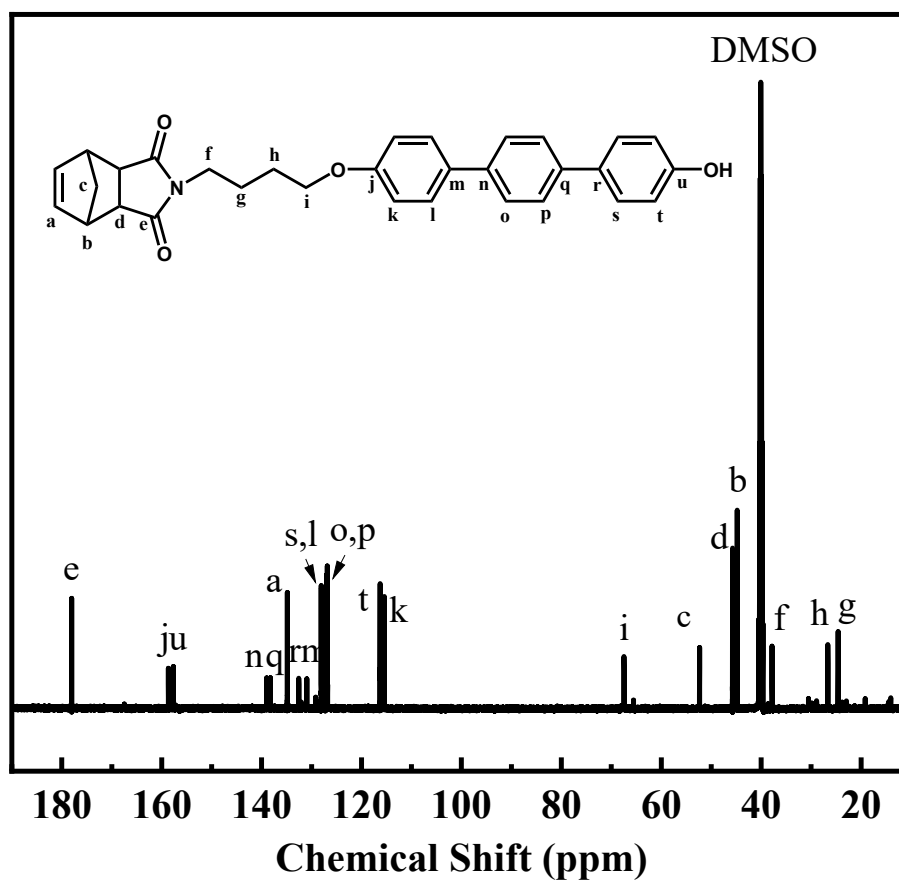

Figure S7.  $^{13}\text{C}$  NMR spectra of Nor-terph in  $\text{DMSO-}d_6$ .

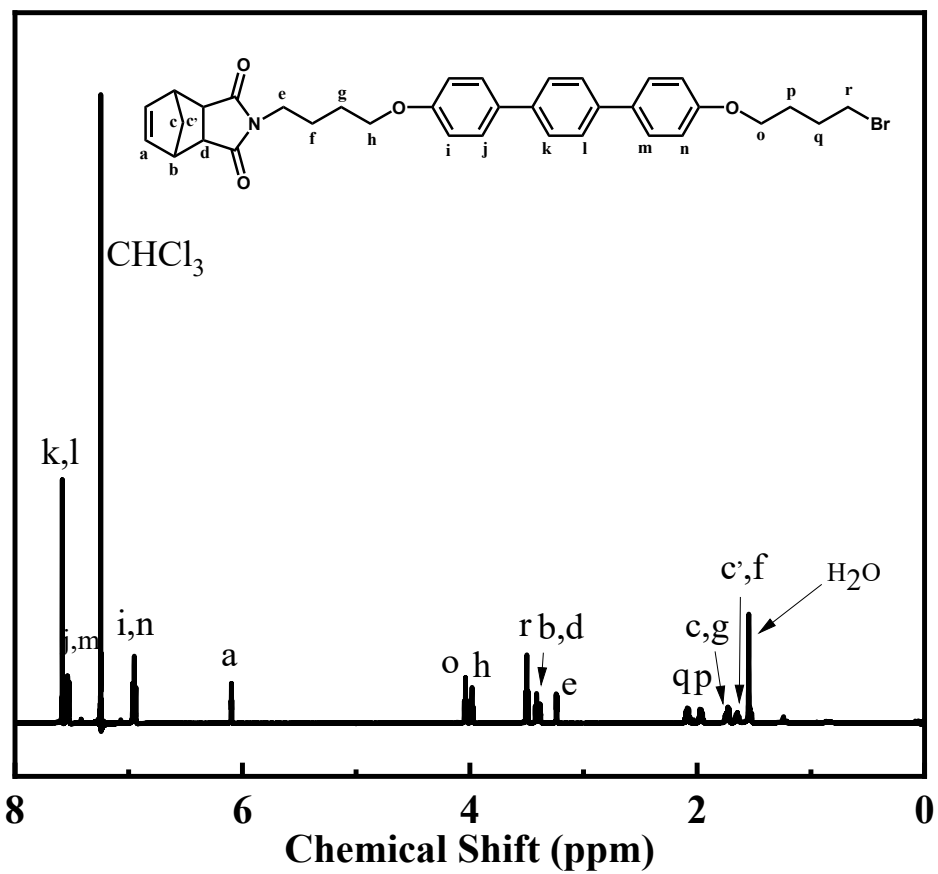

Figure S8.  $^1\text{H}$  NMR spectra of Nor-terph-bromobutyl in  $\text{CDCl}_3$ .

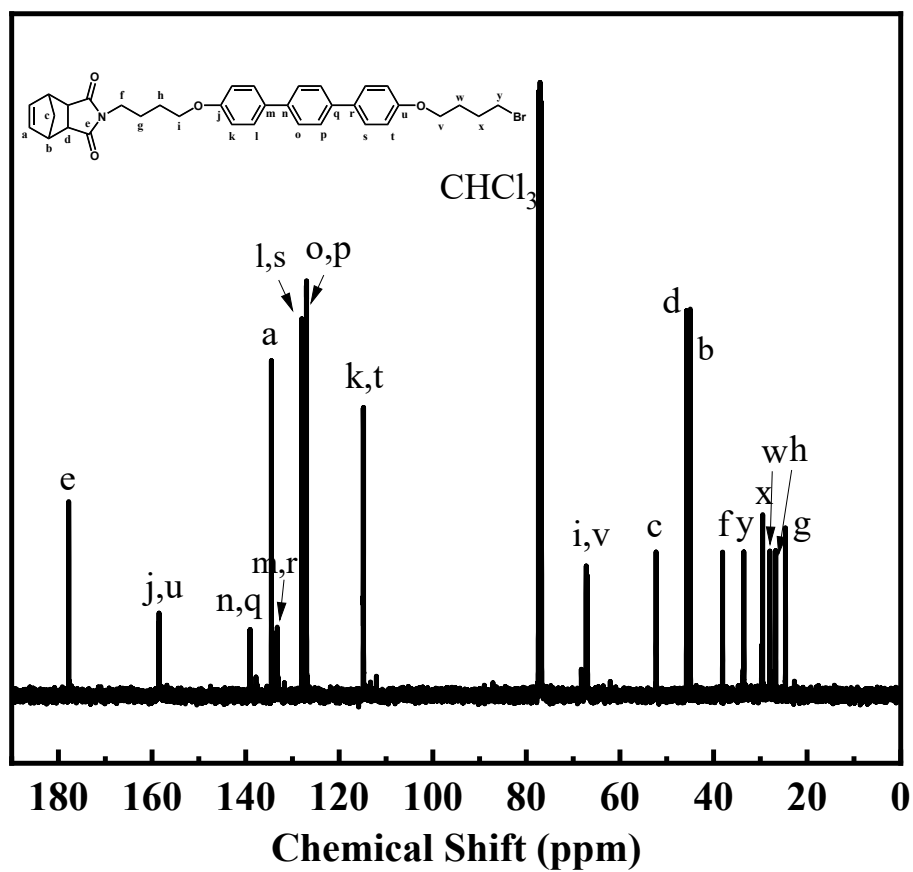

Figure S9.  $^{13}\text{C}$  NMR spectra of Nor-terph-bromobutyl in  $\text{CDCl}_3$ .

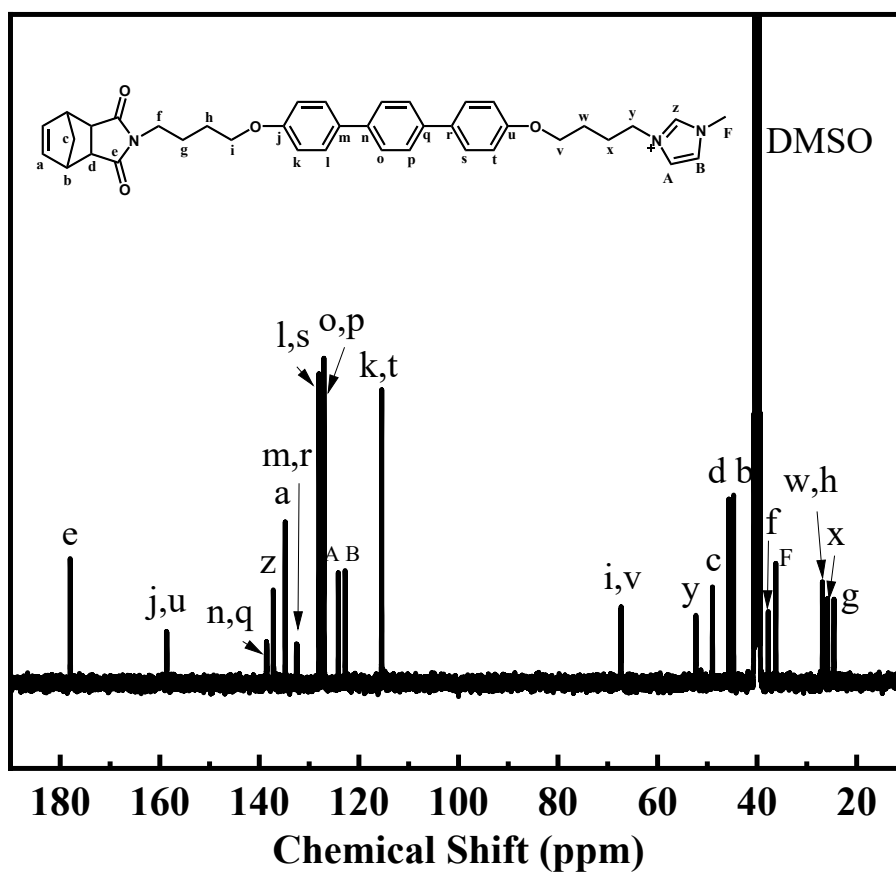

Figure S10.  $^{13}\text{C}$  NMR spectra of TMTBDI[Cl] in  $\text{DMSO-}d_6$ .

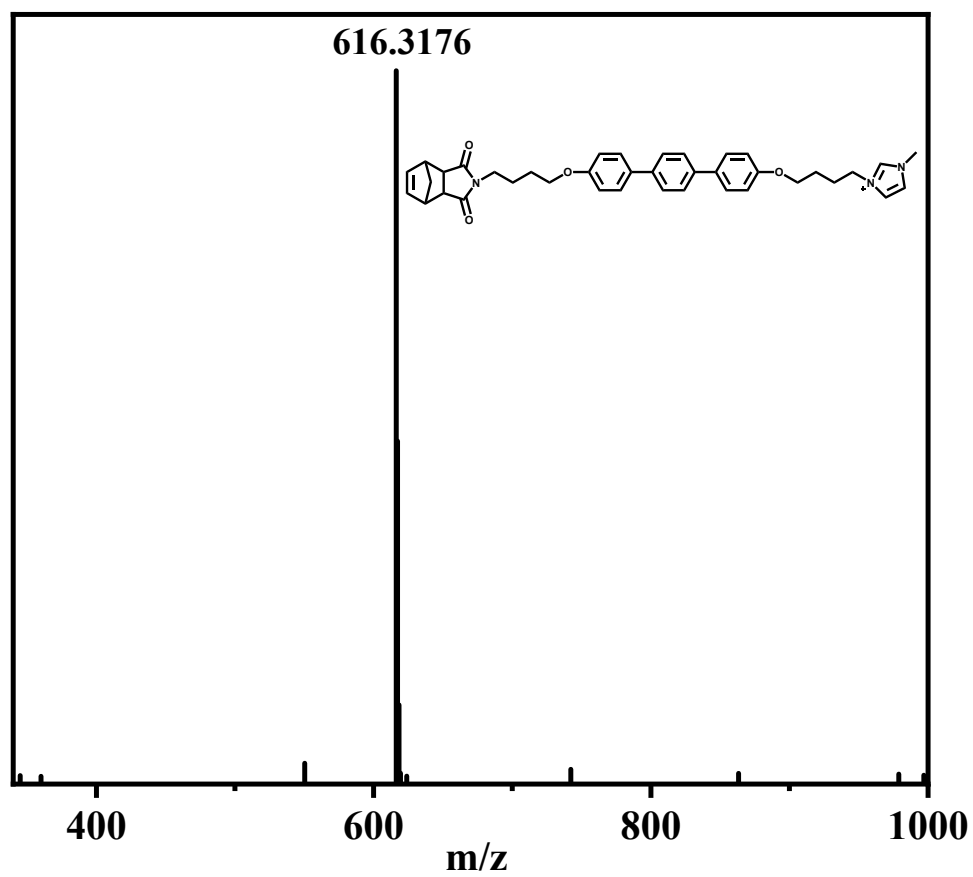

Figure S11. Mass spectrum of TMTBDI[Cl].

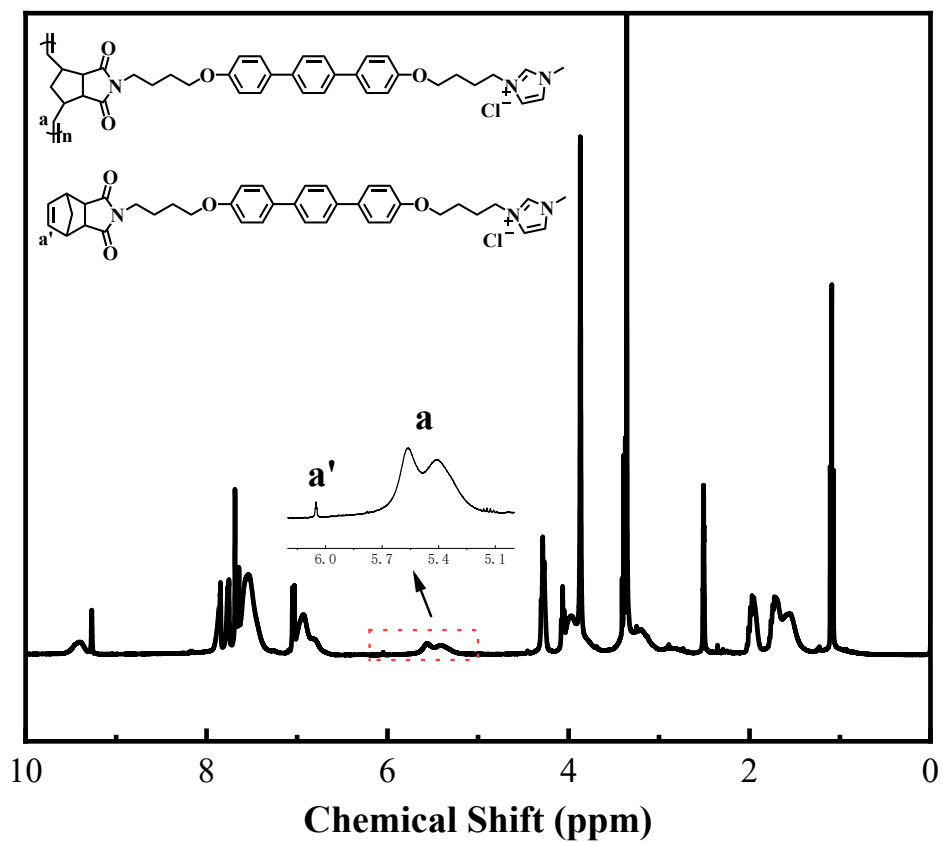

Figure S12.  $^1\text{H}$  NMR spectra of polymerization reaction solution in  $\text{DMSO-}d_6$ .

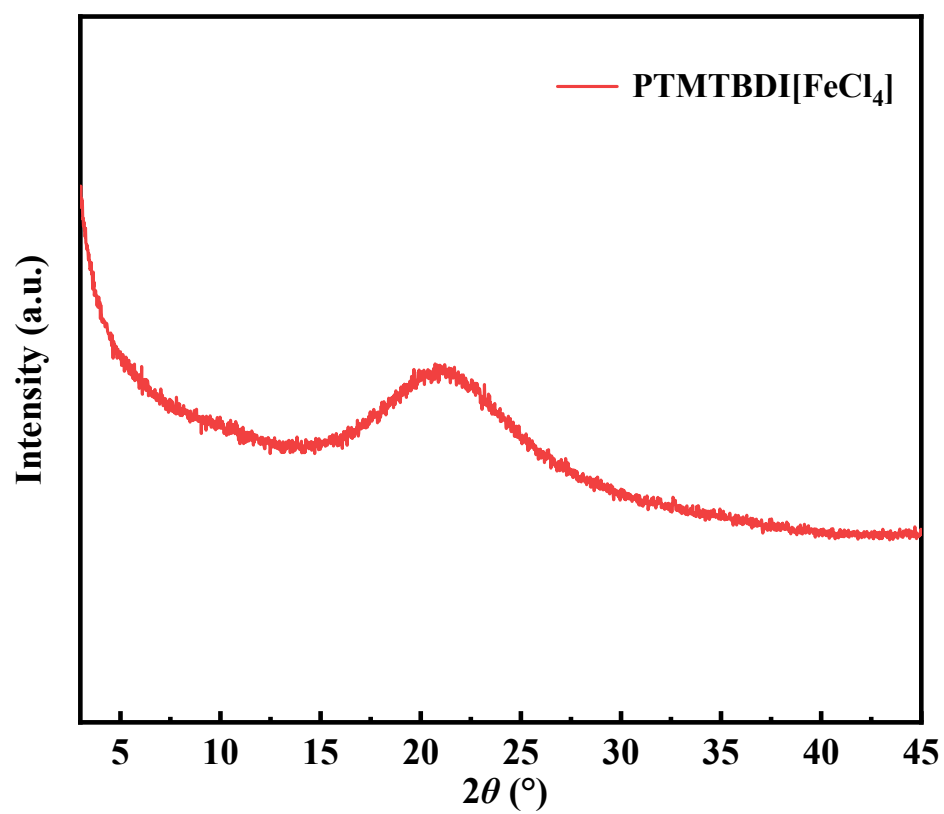

Figure S13. XRD pattern of PTMTBDI[FeCl<sub>4</sub>] before self-assembly.

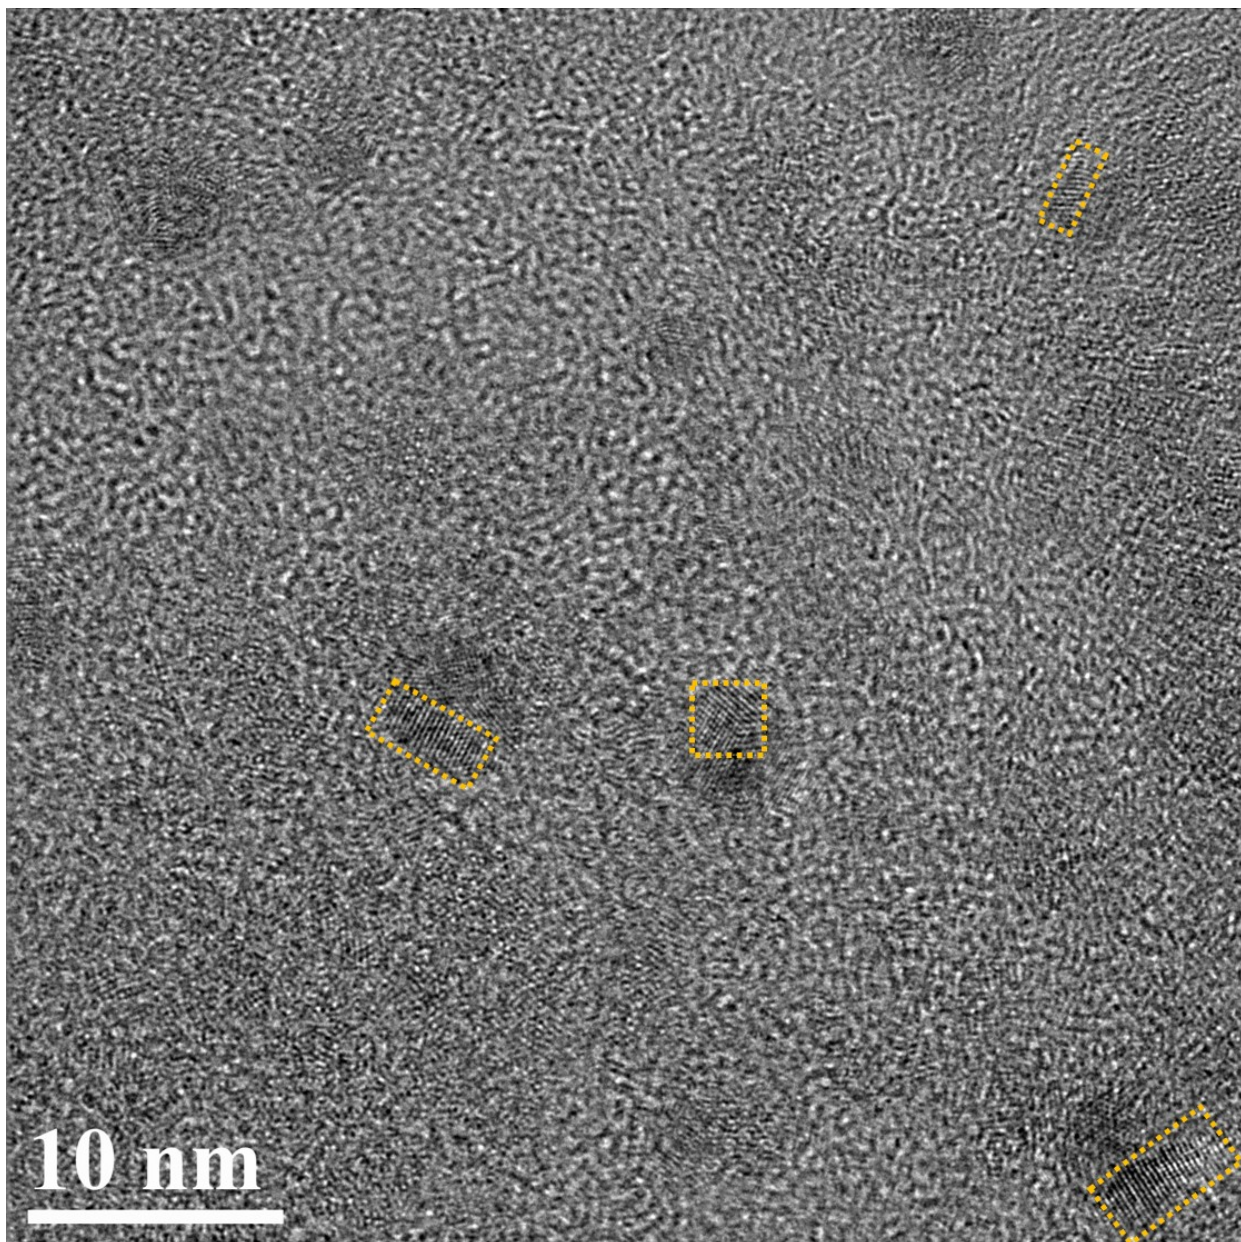

Figure S14. HR-TEM image of self-assembled PTMTBDI[FeCl<sub>4</sub>].



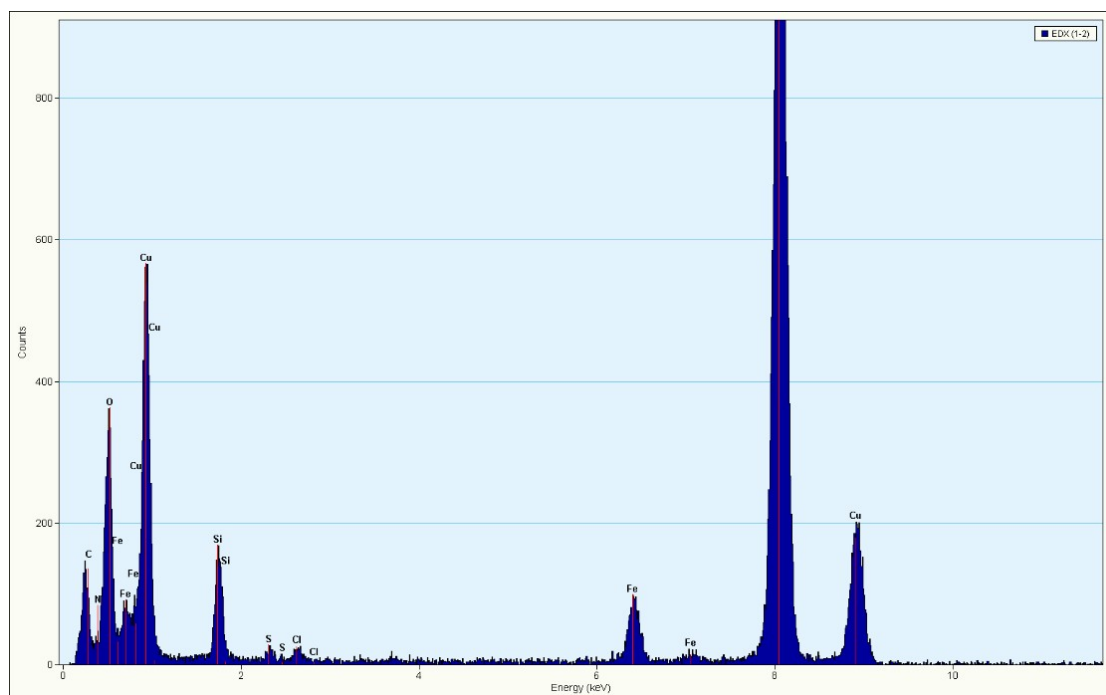

Figure S15. Energy spectra of self-assembled PTMTBDI[FeCl<sub>4</sub>].

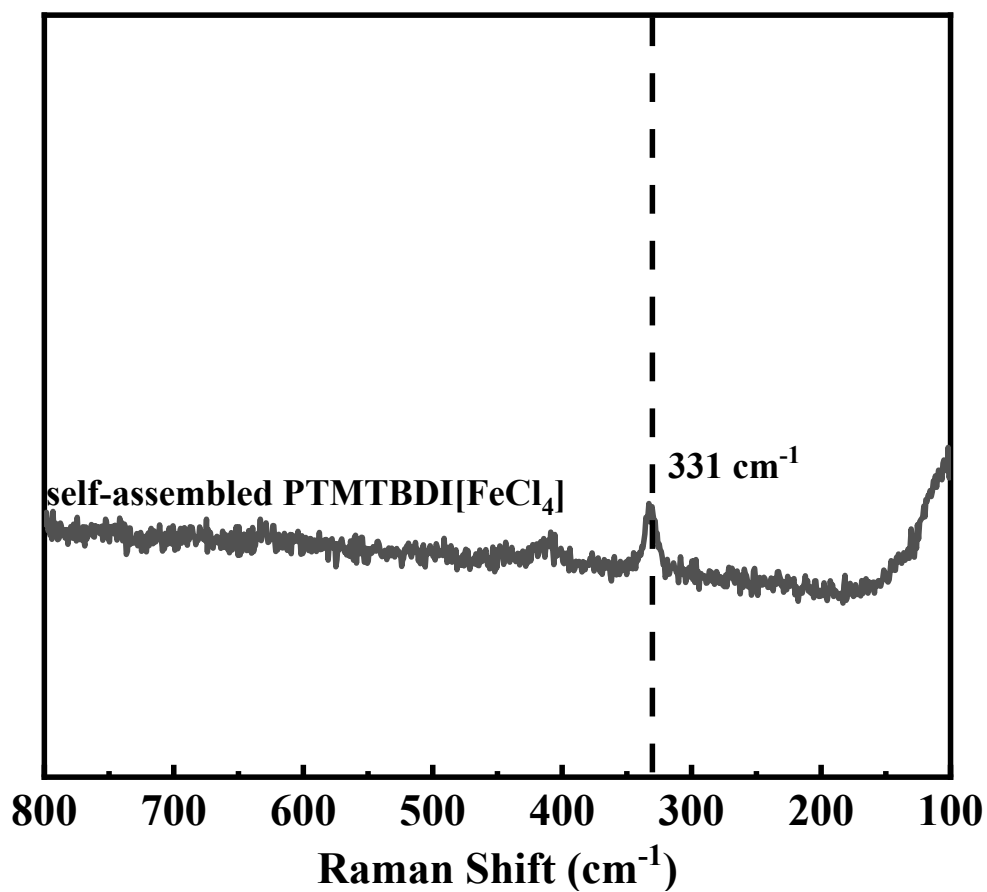

Figure S16. Raman spectra of self-assembled PTMTBDI[FeCl<sub>4</sub>].

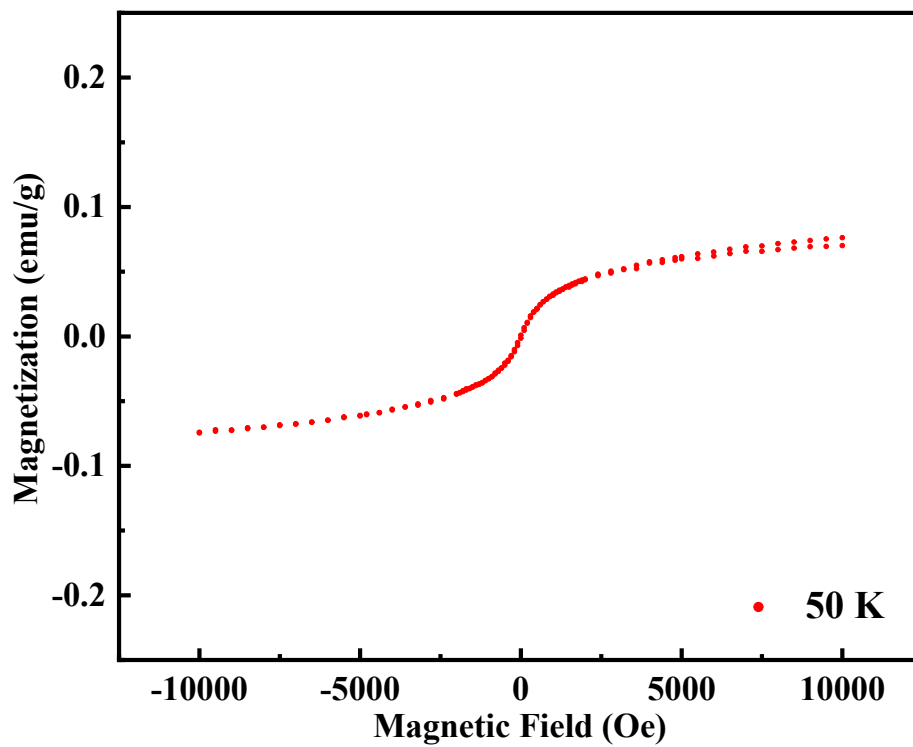

Figure S17. Magnetic field dependence of the magnetization at 50 K for self-assembled PTMTBDI[FeCl<sub>4</sub>].
